# Supplementary material
Source: PubMed Central journal article supplement (PMC3662801)
Supplement: NIHMS433333-supplement-03.pdf [file NIHMS433333-supplement-03.pdf]

**Table S1. Description of Medical Conditions and Illnesses Falling Into Each Medical Problem Category**

| Medical Problem Category   | Medical Conditions or Illnesses                                                                                                                                                                                                                                                                                                                                                                                                                                                                                                                                                                                                                                                                                                                                  |
|----------------------------|------------------------------------------------------------------------------------------------------------------------------------------------------------------------------------------------------------------------------------------------------------------------------------------------------------------------------------------------------------------------------------------------------------------------------------------------------------------------------------------------------------------------------------------------------------------------------------------------------------------------------------------------------------------------------------------------------------------------------------------------------------------|
| Neurological/Neuromuscular | Convulsions, seizures, epilepsy; encephalitis; head injury; meningitis; migraine headaches; repeated headaches; polio, palsy, or paralysis; stroke; vision problems (e.g. glaucoma); other.                                                                                                                                                                                                                                                                                                                                                                                                                                                                                                                                                                      |
| Genito-Urinary             | Kidney disease; sexually transmitted disease; other.                                                                                                                                                                                                                                                                                                                                                                                                                                                                                                                                                                                                                                                                                                             |
| Cardiovascular             | Angina (chest pain)/myocardial infarction (heart attack); hypertension (high blood pressure); heart valve problems (leaky valve); rheumatic heart disease; other.                                                                                                                                                                                                                                                                                                                                                                                                                                                                                                                                                                                                |
| Other Medical Condition    | Cancer; dermatologic/skin disease (skin disorder, scleroderma, other); endocrine/glandular (hyperthyroid, hypothyroid, other); gastrointestinal/digestive system (irritable bowel syndrome, celiac disease, gallbladder problems, hepatitis/jaundice, liver disease, ulcerative colitis or Crohn's disease, other), hematologic/blood disorder (anemia, other); infectious (tuberculosis, rheumatic fever, seropositive for HIV, AIDS, ARC, other); metabolic (diabetes, hypercholesterolemia, hypoglycemia, other); musculo-skeletal (myasthenia gravis, multiple sclerosis, other); respiratory (asthma, bronchitis, emphysema, other); systemic (allergies, arthritis/rheumatism, autoimmune disease, other); other (lead poisoning, unconsciousness, other). |

Note: AIDS = Acquired Immune Deficiency Syndrome; ARC = AIDS-related complex; HIV = Human Immunodeficiency Virus.

Table S2. Bivariate Tetrachoric Correlations Between Variables in the Structural Equation Model (N=271)

|                                       | 1           | 2           | 3           | 4           | 5     | 6           | 7           | 8           | 9           | 10 |
|---------------------------------------|-------------|-------------|-------------|-------------|-------|-------------|-------------|-------------|-------------|----|
| 1 License ever revoked or suspended   |             |             |             |             |       |             |             |             |             |    |
| 2 Cited for speeding $\geq 5$ times   | <b>0.41</b> |             |             |             |       |             |             |             |             |    |
| 3 Cited for reckless driving          | <b>0.37</b> | <b>0.45</b> |             |             |       |             |             |             |             |    |
| 4 Cited for driving while intoxicated | <b>0.50</b> | 0.03        | <b>0.37</b> |             |       |             |             |             |             |    |
| 5 Cited for other moving violations   | <b>0.20</b> | <b>0.33</b> | <b>0.44</b> | 0.07        |       |             |             |             |             |    |
| 6 Sex by age 15                       | <b>0.35</b> | 0.11        | 0.08        | <b>0.31</b> | -0.06 |             |             |             |             |    |
| 7 Lifetime partners 26 or more        | <b>0.42</b> | <b>0.27</b> | 0.15        | <b>0.30</b> | 0.19  | <b>0.45</b> |             |             |             |    |
| 8 No birth control in 20s             | <b>0.29</b> | 0.20        | 0.02        | 0.02        | 0.10  | <b>0.30</b> | <b>0.37</b> |             |             |    |
| 9 No birth control in 30s             | 0.14        | 0.16        | -0.06       | -0.08       | 0.07  | <b>0.26</b> | 0.08        | <b>0.64</b> |             |    |
| 10 No birth control last year         | 0.18        | 0.01        | 0.11        | 0.19        | 0.11  | <b>0.27</b> | 0.09        | <b>0.47</b> | <b>0.77</b> |    |

Note: Significant correlations are shown in bold ( $p < .05$ ).

**Table S3. Lifetime History of Risky Driving and Sexual Behaviors of Probands With and Without Lifetime Conduct Disorder (CD) or Antisocial Personality Disorder (APD) and All Comparisons**

| Risky Behaviors                                | (1)                                                                                         | (2)                                                                                               | (3)                                                                              | $\chi^2$ or<br><i>F</i> | <i>p</i> | Pairwise<br>Contrasts |
|------------------------------------------------|---------------------------------------------------------------------------------------------|---------------------------------------------------------------------------------------------------|----------------------------------------------------------------------------------|-------------------------|----------|-----------------------|
|                                                | Probands With<br>CD/APD<br>( <i>N</i> = 84) <sup>a</sup><br>n/ <i>N</i> (%) or<br>Mean (SD) | Probands<br>Without<br>CD/APD<br>( <i>N</i> = 51) <sup>a</sup><br>n/ <i>N</i> (%) or<br>Mean (SD) | Comparisons<br>( <i>N</i> = 136) <sup>a</sup><br>n/ <i>N</i> (%) or<br>Mean (SD) |                         |          |                       |
| <b>Risky Driving<sup>b</sup></b>               |                                                                                             |                                                                                                   |                                                                                  |                         |          |                       |
| License revoked or suspended                   | 56/76 (74)                                                                                  | 12/49 (24)                                                                                        | 41/134 (31)                                                                      | 44.61                   | .0001    | 1>2,3                 |
| Cited for speeding $\geq$ 5 times              | 35/76 (46)                                                                                  | 10/49 (20)                                                                                        | 30/133 (23)                                                                      | 15.15                   | .0005    | 1>2,3                 |
| Cited for reckless driving                     | 12/75 (16)                                                                                  | 5/49 (10)                                                                                         | 8/133 (6)                                                                        | 5.46                    | .07      | 1>3                   |
| Cited for driving while intoxicated            | 17/78 (22)                                                                                  | 3/49 (6)                                                                                          | 16/134 (12)                                                                      | 7.01                    | .03      | 1>2                   |
| Cited for other moving violations <sup>c</sup> | 44/73 (60)                                                                                  | 25/49 (51)                                                                                        | 54/133 (41)                                                                      | 7.49                    | .02      | 1>3                   |
| <b>Risky Sex</b>                               |                                                                                             |                                                                                                   |                                                                                  |                         |          |                       |
| Sexual debut by age 15                         | 52/82 (63)                                                                                  | 12/50 (24)                                                                                        | 26/129 (20)                                                                      | 44.54                   | .0001    | 1>2,3                 |
| Lifetime number of sexual partners             |                                                                                             |                                                                                                   |                                                                                  |                         |          |                       |
| 0–5                                            | 17/79 (22)                                                                                  | 17/48 (35)                                                                                        | 41/123 (33)                                                                      | 4.03                    | .13      |                       |

|                                |            |            |             |       |             |
|--------------------------------|------------|------------|-------------|-------|-------------|
| 6-10                           | 14/79 (18) | 13/48 (27) | 30/123 (24) | 1.83  | .40         |
| 11-25                          | 17/79 (22) | 12/25 (48) | 31/123 (25) | 0.39  | .82         |
| 26 or more                     | 31/79 (39) | 6/48 (13)  | 21/123 (17) | 17.08 | .0001 1>2,3 |
| No birth control use in 20s    | 35/80 (44) | 13/50 (26) | 24/130 (18) | 15.91 | .001 1>2,3  |
| No birth control use in 30s    | 40/80 (50) | 16/50 (32) | 32/130 (25) | 14.35 | .001 1>2,3  |
| No birth control use last year | 45/78 (58) | 20/48 (42) | 53/128 (41) | 5.71  | .06         |

Note: <sup>a</sup> Variable Ns due to missing data and skip pattern.

<sup>b</sup> Among individuals who ever had a driver's license.

<sup>c</sup> Making illegal turn, failing to yield, failing to stop, or tailgating.

**Table S4. Relationship between Childhood Attention-Deficit/Hyperactivity Disorder (ADHD), Antisocial Personality Disorder (APD), and Risky Driving in the Past Five Years**

| Driving History                            | Probands With APD <sup>a</sup><br>(N = 24) <sup>b</sup> |             | Probands Without APD <sup>a</sup><br>(N = 104) <sup>b</sup> |         | Comparisons<br>(N = 134) <sup>b</sup> | $\chi^2$ | p | Pairwise<br>Contrasts |
|--------------------------------------------|---------------------------------------------------------|-------------|-------------------------------------------------------------|---------|---------------------------------------|----------|---|-----------------------|
|                                            | n/N (%)                                                 | n/N (%)     | n/N (%)                                                     | n/N (%) |                                       |          |   |                       |
| License was revoked or suspended           | 7/23 (30)                                               | 7/102 (7)   | 6/133 (5)                                                   | 18.61   | .0001                                 | 1>2,3    |   |                       |
| Cited for speeding                         | 12/21 (57)                                              | 45/104 (43) | 40/132 (30)                                                 | 7.82    | .02                                   | 1,2>3    |   |                       |
| Cited for reckless driving                 | 2/20 (10)                                               | 4/104(4)    | 3/133 (2)                                                   | 3.15    | .21                                   |          |   |                       |
| Cited for driving while intoxicated        | 1/23 (4)                                                | 4/104 (4)   | 4/134 (3)                                                   | 0.19    | .91                                   |          |   |                       |
| Cited other moving violations <sup>c</sup> | 7/20 (35)                                               | 13/102 (13) | 17/131 (13)                                                 | 7.22    | .03                                   | 1>2,3    |   |                       |

Note: Analyses restricted to those who ever had a driver's license.

<sup>a</sup> Probable or Definite Antisocial Personality Disorder in the Past 5 Years.

<sup>b</sup> Variable Ns due to skips and missing data.

<sup>c</sup> Making an illegal turn, failure to yield, failure to stop at a stop sign, and tailgating.

**Table S5. Childhood Characteristics of Probands who Were Interviewed, Lost to Follow-Up, and Deceased**

| <b>Childhood Characteristic</b>             | <b>In FU41<br/>(N = 135)<sup>a</sup></b> | <b>Lost to<br/>Follow-Up<br/>(N = 61)</b> | <b>Deceased<br/>(N = 11)<sup>a</sup></b> | <b><i>F</i></b> | <b><i>p</i></b> |
|---------------------------------------------|------------------------------------------|-------------------------------------------|------------------------------------------|-----------------|-----------------|
| SES at Referral<br>(Hollingshead & Redlich) | 3.19 (1.05)                              | 3.26 (0.95)                               | 3.55 (0.82)                              | 0.66            | 0.52            |
| WISC Full Scale IQ                          | 104.17<br>(12.30)                        | 103.18<br>(10.79)                         | 109.91<br>(10.73)                        | 1.51            | 0.22            |
| Conners Hyperactivity<br>Factor Score       | 2.11 (0.46)                              | 2.17 (0.43)                               | 2.13 (0.40)                              | 0.38            | 0.69            |

Note. SES = Socioeconomic Status; WISC = Wechsler Intelligence Scale for Children.

<sup>a</sup> 4/15 deceased probands had informant interviews. They are included in the column of the 135 probands who were interviewed. The conclusions were the same when including these subjects in the “Deceased” column (*ps* .38–.74).

**Table S6. Mortality Rates by Mental Disorder in Probands**

| Lifetime, Probable or Definite<br>Diagnosis            | Probands<br>(N = 207)      |                            | $\chi^2$ | <i>P</i><br>(two-<br>tailed) |
|--------------------------------------------------------|----------------------------|----------------------------|----------|------------------------------|
|                                                        | Deceased                   |                            |          |                              |
|                                                        | Yes<br>(N = 15)<br>n/N (%) | No<br>(N = 192)<br>n/N (%) |          |                              |
| Any Mood Disorder                                      | 3/14 (21)                  | 72/186 (39)                | 1.7      | .20                          |
| Any Anxiety Disorder                                   | 1/14 (7)                   | 26/186 (14)                | FET      | .70                          |
| Any Substance Use Disorder                             | 7/14 (50)                  | 107/186 (58)               | 0.30     | .58                          |
| Conduct Disorder or Antisocial<br>Personality Disorder | 9/14 (64)                  | 108/186 (58)               | 0.21     | .65                          |
| ANY OF THE ABOVE                                       | 11/14 (79)                 | 152/186 (82)               | FET      | .73                          |

Note: Used when expected cell counts < 5. Variable Ns due to attrition. FET = Fisher's Exact Test.

Figure S1: Measurement Model of Risk-Taking Behaviors. Note: Unstandardized coefficients. Fit Statistics:  $\chi^2_{(21)}=29.63$ ,  $p=.10$ ; Comparative Fit Index (CFI)=.97; Tucker Lewis Index (TLI)=.96; Root Mean Square Error of Approximation (RMSEA)=.04. \*\*\*  $p<.001$ , \*\*  $p<.01$ , \*  $p\leq.05$ .

Figure S2. Childhood attention-deficit/hyperactivity disorder (ADHD) Predicting Risky Driving and Risky Sex in Adulthood. Note: Unstandardized coefficients. Fit Statistics:  $\chi^2(11) =12.98$ ,  $p=.29$ ; Comparative Fit Index (CFI)=.98; Tucker Lewis Index (TLI)=.98; Root Mean Square Error of Approximation (RMSEA)=.03. \*\*\*  $p<.001$ , \*\*  $p<.01$ , \*  $p<.05$

Accepted manuscript
